# Supplementary material
Source: PubMed Central journal article supplement (PMC7237361)
Supplement: mmc1.pdf [file mmc1.pdf]

# THE LANCET

## Child & Adolescent Health

### Supplementary appendix

This appendix formed part of the original submission and has been peer reviewed.  
We post it as supplied by the authors.

Supplement to: Tullie L, Ford K, Bisharat M, et al. Gastrointestinal features in children with COVID-19: an observation of varied presentation in eight children. *Lancet Child Adolesc Health* 2020; published online May 19. [https://doi.org/10.1016/S2352-4642\(20\)30165-6](https://doi.org/10.1016/S2352-4642(20)30165-6).

Table 1: Demographics, clinical presentation and imaging findings

| Patient number | Age (years), Gender | Ethnicity     | Medical History          | SARS-CoV-2 PCR | Symptom duration (days) | Intensive care support                | Labs          | Imaging                                                                                                                                 |
|----------------|---------------------|---------------|--------------------------|----------------|-------------------------|---------------------------------------|---------------|-----------------------------------------------------------------------------------------------------------------------------------------|
| 1.             | 4, Male             | Asian British | Autism spectrum disorder | Positive       | 1                       | No                                    | WCC 17.7      | US abdomen: mesenteric lymphadenopathy, terminal ileitis, normal appendix                                                               |
|                |                     |               |                          |                |                         |                                       | CRP <1        |                                                                                                                                         |
|                |                     |               |                          |                |                         |                                       | Urea 7.8      |                                                                                                                                         |
|                |                     |               |                          |                |                         |                                       | Cr 31         |                                                                                                                                         |
|                |                     |               |                          |                |                         |                                       | Troponin <12  |                                                                                                                                         |
| 2.             | 5, Male             | Asian British | Nil                      | Negative       | 7                       | No                                    | WCC 11.7      | US abdomen: mesenteric lymphadenopathy and free fluid in right iliac fossa, no bowel wall thickening, normal appendix                   |
|                |                     |               |                          |                |                         |                                       | CRP 205       |                                                                                                                                         |
|                |                     |               |                          |                |                         |                                       | Urea 2.9      |                                                                                                                                         |
|                |                     |               |                          |                |                         |                                       | Cr 26         |                                                                                                                                         |
|                |                     |               |                          |                |                         |                                       | Troponin 85   |                                                                                                                                         |
| 3.             | 8, Male             | Asian British | Nil                      | Positive*      | 7                       | Yes                                   | WCC 55.9      | US abdomen: echogenic fat and mild terminal ileal thickening, appendix not visualised, no significant lymphadenopathy                   |
|                |                     |               |                          |                |                         | (Intubation & ventilation, inotropes) | CRP 416       | Awaiting improvement of renal function prior to performing CT                                                                           |
|                |                     |               |                          |                |                         |                                       | Urea 14.2     |                                                                                                                                         |
|                |                     |               |                          |                |                         |                                       | Cr 169        |                                                                                                                                         |
|                |                     |               |                          |                |                         |                                       | Troponin 5113 |                                                                                                                                         |
| 4.             | 11, Female          | Asian British | Mild asthma              | Positive       | 5                       | Yes                                   | WCC 19.6      | US abdomen: bowel wall thickening involving ileocaecal junction with mesenteric lymphadenopathy. Appendix not seen                      |
|                |                     |               |                          |                |                         | (Extracorporeal membrane oxygenation) | CRP 321       | CT abdomen: Fluid filled appendix with appendicolith but no inflammation. Thickened caecum and multiple enlarged mesenteric lymph nodes |
|                |                     |               |                          |                |                         |                                       | Urea 7.6      |                                                                                                                                         |
|                |                     |               |                          |                |                         |                                       | Cr 46         |                                                                                                                                         |
|                |                     |               |                          |                |                         |                                       | Troponin 2000 |                                                                                                                                         |
| 5.             | 12, Female          | Asian British | Nil                      | Positive       | 7                       | Yes                                   | WCC 7.25      | US abdomen: multiple enlarged lymph nodes in right lower quadrant. Appendix not seen.                                                   |
|                |                     |               |                          |                |                         | (Inotropes)                           | CRP 293       | CT abdomen: non-inflamed retrocaecal appendix, terminal ileal thickening and mesenteric lymphadenopathy                                 |
|                |                     |               |                          |                |                         |                                       | Urea 1.9      |                                                                                                                                         |

|    |            |                |     |          |   |                                       |              |                                                                                                                                                                                                                                 |
|----|------------|----------------|-----|----------|---|---------------------------------------|--------------|---------------------------------------------------------------------------------------------------------------------------------------------------------------------------------------------------------------------------------|
|    |            |                |     |          |   |                                       | Cr 26        |                                                                                                                                                                                                                                 |
|    |            |                |     |          |   |                                       | Troponin 147 |                                                                                                                                                                                                                                 |
| 6. | 14, Male   | Black British  | Nil | Positive | 5 | Yes                                   | WCC 11.8     | US abdomen: inflammatory changes in ileocaecal region associated with lymphadenopathy. No features of appendicitis. (Nb. This was performed after the CT to confirm findings)                                                   |
|    |            |                |     |          |   | (Intubation & ventilation, inotropes) | CRP 293      | CT abdomen (non-contrast): inflammatory change in the right iliac fossa with matted bowel loops. Focal collection and enlarged mesenteric lymph nodes. Collapsed bowel loops, no visible collection or evidence of appendicitis |
|    |            |                |     |          |   |                                       | Urea 11.7    |                                                                                                                                                                                                                                 |
|    |            |                |     |          |   |                                       | Cr 148       |                                                                                                                                                                                                                                 |
|    |            |                |     |          |   |                                       | Troponin 345 |                                                                                                                                                                                                                                 |
| 7. | 15, Male   | White European | Nil | Negative | 7 | No                                    | WCC 9.4      | US abdomen: inflammatory change and echogenic fat in right iliac fossa, mesenteric lymphadenopathy. Appendix not visualised.                                                                                                    |
|    |            |                |     |          |   |                                       | CRP 239      | CT abdomen: calcified appendicolith in non-inflamed appendix. Thickening of terminal ileum consistent with terminal ileitis.                                                                                                    |
|    |            |                |     |          |   |                                       | Urea 4       |                                                                                                                                                                                                                                 |
|    |            |                |     |          |   |                                       | Cr 48        |                                                                                                                                                                                                                                 |
|    |            |                |     |          |   |                                       | Troponin 478 |                                                                                                                                                                                                                                 |
| 8. | 16, Female | White British  | Nil | Negative | 2 | No                                    | WCC 11.8     | US abdomen: terminal ileal inflammation with local lymphadenopathy, normal appendix                                                                                                                                             |
|    |            |                |     |          |   |                                       | CRP 199      |                                                                                                                                                                                                                                 |
|    |            |                |     |          |   |                                       | Urea 1.9     |                                                                                                                                                                                                                                 |
|    |            |                |     |          |   |                                       | Cr 42        |                                                                                                                                                                                                                                 |

\*Initially SARS-CoV-2 PCR negative, subsequent positive PCR
